# Supplementary material
Source: Springer Nature journal article supplement (https://www.springermedizin.de/resource/supplementary/12874_2008_285_MOESM1_ESM.pdf/9434154)

$f(x)$ 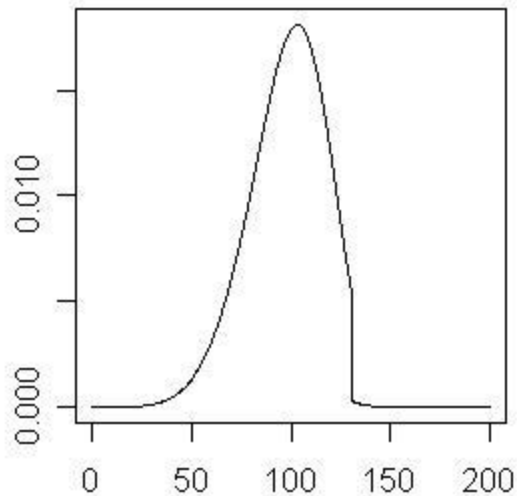 $x$ 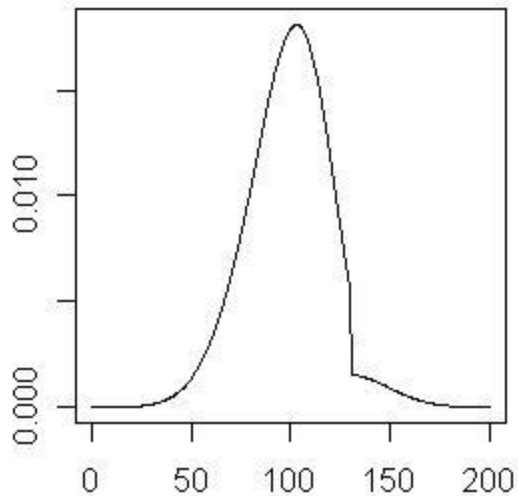 $x$

Supplement: MOESM1 [file 9434154]
